# Supplementary material for: Construction of strontium-loaded injectable lubricating hydrogel and its role in promoting repair of cartilage defects
Source: Royal Society of Chemistry journal article supplement (doi:10.1039/d4bm01260g), 2024-11-22
Supplement: d4bm01260g1.pdf [file d4bm01260g1.pdf]

## Supplementary Information

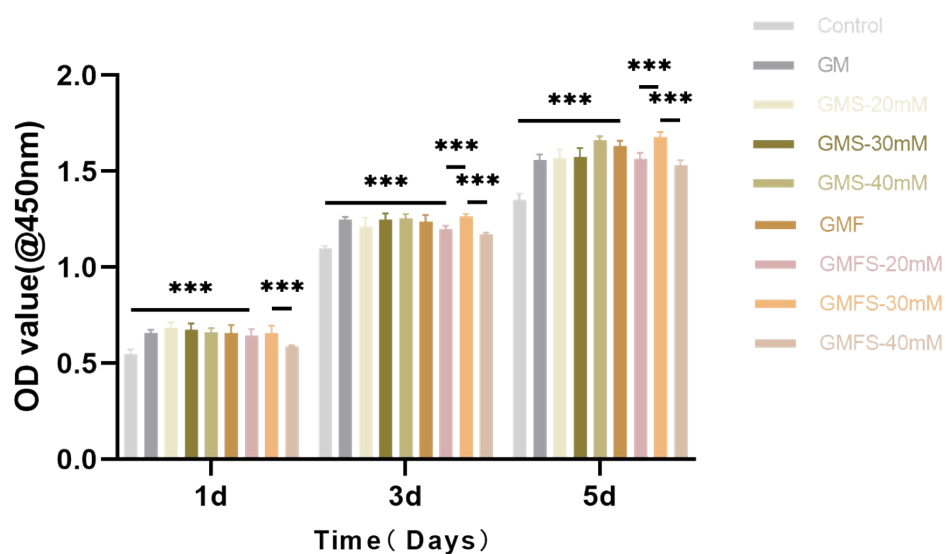

**Figure S1.** OD values of BMSCs cultured for 1, 3, 5 days with normal complete medium and extracts from each group of hydrogels. (\*\*\*) $p < 0.001$
