# Supplementary material for: Construction of strontium-loaded injectable lubricating hydrogel and its role in promoting repair of cartilage defects
Source: Royal Society of Chemistry journal article supplement (doi:10.1039/d4bm01260g), 2024-11-22
Supplement: d4bm01260g2.pdf [file d4bm01260g2.pdf]

## The experimental western blot results

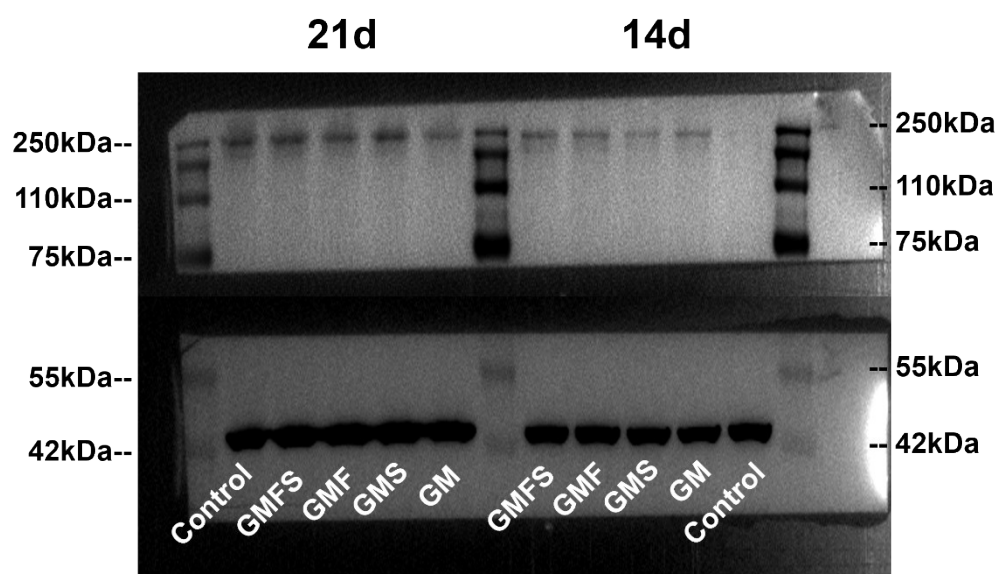

Figure 1. Western blot photomicrograph of protein ACAN.

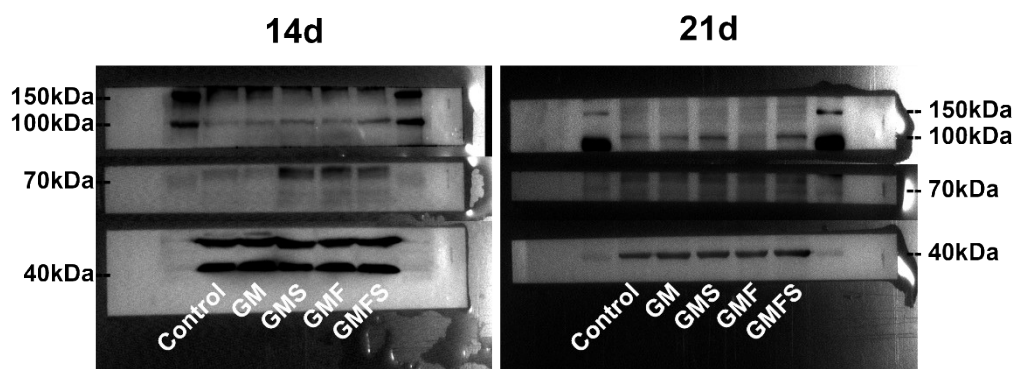

Figure 2. Western blot photomicrographs of protein HIF-1 $\alpha$ .

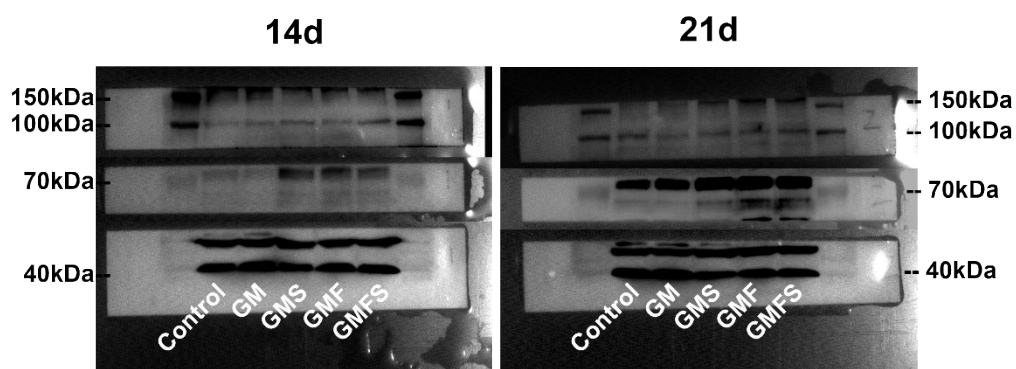

Figure 3. Western blot photomicrographs of protein SOX9.
